# Supplementary material
Source: MDPI journal article supplement (https://www.mdpi.com/2073-4344/13/2/277)
Supplement: s1 [file s1]

## Supplementary materials

# Reactivity of Sulfur and Nitrogen Compounds of FCC Light Cycle Oil in Hydrotreating over CoMoS and NiMoS Catalysts

Jihyun Kim<sup>1</sup> and Yong-Kul Lee<sup>1,\*</sup>

<sup>1</sup>Laboratory of Advanced Catalysis for Energy and Environment, Department of Chemical Engineering, Dankook University, 152 Jukjeon-ro, Yongin 16890, Republic of Korea

\*Correspondence: yolee@dankook.ac.kr

**Fig. S1.** The structure of heterocyclic aromatic compounds with labeled C atoms: (a) benzothiophene, (b) dibenzothiophene, and (c) carbazole.

**Fig. S2.** N<sub>2</sub> adsorption isotherm plot of (a) CoMoS and (b) NiMoS

**Table S1.** Composition and properties of light cycle oil (LCO)

**Table S2.** Sulfur distribution of LCO

**Table S3.** Nitrogen distribution of LCO

**Table S4.** Physical properties of the support and catalysts

**Table S5.** Group of S compounds in LCO and hydrotreated LCO at 613K

**Table S6.** Group of N compounds in LCO and hydrotreated LCO at 613K

**Table S7.** Rate constants during HDN of CBZ and HDS of DBT over the NiMoS

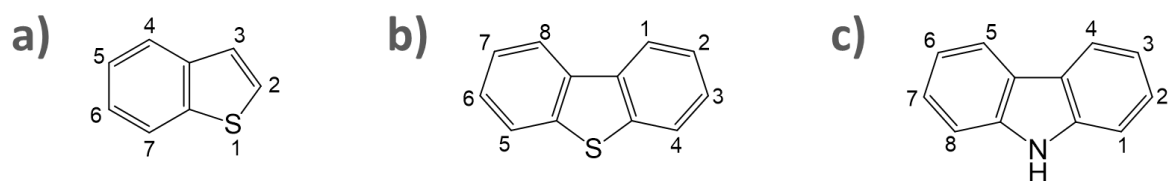

**Fig. S1.** The structure of heterocyclic aromatic compounds with labeled C atoms: (a) benzothiophene, (b) dibenzothiophene, and (c) carbazole.

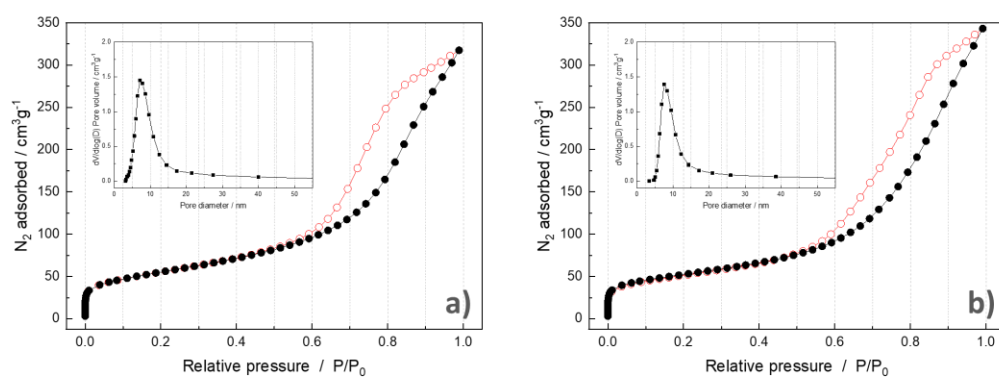

**Fig. S2.** N<sub>2</sub> adsorption isotherm plot of (a) CoMoS and (b) NiMoS

**Table S1.** Composition and properties of light cycle oil (LCO)

| Physical properties  |          | LCO         |
|----------------------|----------|-------------|
| API                  |          | 13.5        |
| S / ppm              |          | 3930        |
| N / ppm              |          | 550         |
| Color (ASTM)         |          | L2.5        |
| Aromatics /<br>wt. % | Total    | 74.3        |
|                      | Mono     | 14.3        |
|                      | Di       | 40.6        |
|                      | Tri+     | 19.4        |
| Cetane Index         |          | 24.9        |
| Distillation<br>/ °C | IBP/5/10 | 225/256/262 |
|                      | 30/40/50 | 284/292/308 |
|                      | 60/90/95 | 325/398/-   |
|                      | EP       | -           |

**Table S2.** Sulfur distribution of LCO

| #  | Compounds                         | Formula                           | ppm | Fraction<br>/ % | #  | Compounds                                  | Formula                           | ppm | Fraction<br>/ % |
|----|-----------------------------------|-----------------------------------|-----|-----------------|----|--------------------------------------------|-----------------------------------|-----|-----------------|
| 1  | benzothiophene                    | C <sub>8</sub> H <sub>6</sub> S   | 28  | 0.7             | 15 | 1-methyl dibenzothiophene                  | C <sub>13</sub> H <sub>10</sub> S | 50  | 1.26            |
| 2  | 7-methyl benzothiophene           | C <sub>9</sub> H <sub>8</sub> S   | 48  | 1.23            | 16 | 4-ethyl dibenzothiophene                   | C <sub>14</sub> H <sub>12</sub> S | 38  | 0.97            |
| 3  | 2-methyl benzothiophene           | C <sub>9</sub> H <sub>8</sub> S   | 40  | 1.02            | 17 | 4,6-dimethyl dibenzothiophene              | C <sub>14</sub> H <sub>12</sub> S | 89  | 2.28            |
| 4  | 5-/6-methyl benzothiophene        | C <sub>9</sub> H <sub>8</sub> S   | 57  | 1.46            | 18 | 2,4-dimethyl dibenzothiophene              | C <sub>14</sub> H <sub>12</sub> S | 115 | 2.92            |
| 5  | 3-/4-methyl benzothiophene        | C <sub>9</sub> H <sub>8</sub> S   | 80  | 2.03            | 19 | 2,6-/3,6-dimethyl<br>dibenzothiophene      | C <sub>14</sub> H <sub>12</sub> S | 214 | 5.45            |
| 6  | 2,6-dimethyl benzothiophene       | C <sub>10</sub> H <sub>10</sub> S | 12  | 0.31            | 20 | 2,8-/2,7-/3,7-dimethyl<br>dibenzothiophene | C <sub>14</sub> H <sub>12</sub> S | 108 | 2.74            |
| 7  | 4,5-dimethyl benzothiophene       | C <sub>10</sub> H <sub>10</sub> S | 114 | 2.91            | 21 | 1,4-/1,6--dimethyl<br>dibenzothiophene     | C <sub>14</sub> H <sub>12</sub> S | 87  | 2.22            |
| 8  | 2,4-dimethyl benzothiophene       | C <sub>10</sub> H <sub>10</sub> S | 25  | 0.65            | 22 | 4-ethyl,6-methyl<br>dibenzothiophene       | C <sub>15</sub> H <sub>14</sub> S | 33  | 0.83            |
| 9  | 3,5-dimethyl benzothiophene       | C <sub>10</sub> H <sub>10</sub> S | 51  | 1.29            | 23 | 2,4,6-trimethyl<br>dibenzothiophene        | C <sub>15</sub> H <sub>14</sub> S | 133 | 3.4             |
| 10 | 2,3-dimethyl benzothiophene       | C <sub>10</sub> H <sub>10</sub> S | 38  | 0.96            | 24 | 2,4,8-/2,4,7-trimethyl<br>dibenzothiophene | C <sub>15</sub> H <sub>14</sub> S | 64  | 1.63            |
| 11 | 2,5,7-trimethyl<br>benzothiophene | C <sub>11</sub> H <sub>12</sub> S | 26  | 0.67            | 25 | 1,4,6-trimethyl<br>dibenzothiophene        | C <sub>15</sub> H <sub>14</sub> S | 58  | 1.48            |
| 12 | dibenzothiophene                  | C <sub>12</sub> H <sub>8</sub> S  | 182 | 4.64            | 26 | 1,4,8-trimethyl<br>dibenzothiophene        | C <sub>15</sub> H <sub>14</sub> S | 30  | 0.76            |
| 13 | 4-methyl dibenzothiophene         | C <sub>13</sub> H <sub>10</sub> S | 251 | 6.39            | 27 | 3,4,6-trimethyl<br>dibenzothiophene        | C <sub>15</sub> H <sub>14</sub> S | 47  | 1.2             |
| 14 | 2-/3-methyl dibenzothiophene      | C <sub>13</sub> H <sub>10</sub> S | 287 | 7.3             |    |                                            |                                   |     |                 |

**Table S3.** Nitrogen distribution of LCO

| #  | Compounds                        | Formula                           | ppm | Fraction<br>/ % | #  | Compounds               | Formula                           | ppm | Fraction<br>/ % |
|----|----------------------------------|-----------------------------------|-----|-----------------|----|-------------------------|-----------------------------------|-----|-----------------|
| 1  | carbazole                        | C <sub>12</sub> H <sub>9</sub> N  | 24  | 4.43            | 11 | 3,5-dimethyl carbazole  | C <sub>14</sub> H <sub>13</sub> N | 8   | 1.38            |
| 2  | 1-methyl carbazole               | C <sub>13</sub> H <sub>11</sub> N | 35  | 6.28            | 12 | dimethyl carbazole      | C <sub>14</sub> H <sub>13</sub> N | 12  | 2.24            |
| 3  | 2-methyl carbazole               | C <sub>13</sub> H <sub>11</sub> N | 18  | 3.25            | 13 | 2,4-dimethyl carbazole  | C <sub>14</sub> H <sub>13</sub> N | 18  | 3.3             |
| 4  | 3-methyl carbazole               | C <sub>13</sub> H <sub>11</sub> N | 22  | 4.07            | 14 | 2,5- dimethyl carbazole | C <sub>14</sub> H <sub>13</sub> N | 13  | 2.37            |
| 5  | 4-methyl carbazole               | C <sub>13</sub> H <sub>11</sub> N | 22  | 3.96            | 15 | trimethyl carbazole     | C <sub>15</sub> H <sub>15</sub> N | 17  | 3.05            |
| 6  | 1,8-dimethyl / 1-ethyl carbazole | C <sub>14</sub> H <sub>13</sub> N | 16  | 2.86            | 16 | trimethyl carbazole     | C <sub>15</sub> H <sub>15</sub> N | 20  | 3.71            |
| 7  | 1,4-dimethyl carbazole           | C <sub>14</sub> H <sub>13</sub> N | 27  | 4.87            | 17 | trimethyl carbazole     | C <sub>15</sub> H <sub>15</sub> N | 3   | 0.48            |
| 8  | 1,5-dimethyl carbazole           | C <sub>14</sub> H <sub>13</sub> N | 22  | 3.95            | 18 | trimethyl carbazole     | C <sub>15</sub> H <sub>15</sub> N | 32  | 5.8             |
| 9  | 2,6-/2,7-dimethyl carbazole      | C <sub>14</sub> H <sub>13</sub> N | 30  | 5.51            | 19 | trimethyl carbazole     | C <sub>15</sub> H <sub>15</sub> N | 18  | 3.27            |
| 10 | 1,2-dimethyl carbazole           | C <sub>14</sub> H <sub>13</sub> N | 8   | 1.54            | 20 | tri+ methyl carbazole   |                                   | 100 | 18.11           |

**Table S4.** Physical properties of the support and catalysts

| Samples                                | Condition   | BET surface area                 |                                  |                                 | Pore volume                       |                                 | ICP / wt% |      |      |
|----------------------------------------|-------------|----------------------------------|----------------------------------|---------------------------------|-----------------------------------|---------------------------------|-----------|------|------|
|                                        |             | / m <sup>2</sup> g <sup>-1</sup> |                                  |                                 | / cm <sup>3</sup> g <sup>-1</sup> |                                 |           |      |      |
|                                        |             | S <sub>total</sub>               | S <sub>micro</sub> <sup>a)</sup> | S <sub>meso</sub> <sup>b)</sup> | V <sub>micro</sub> <sup>a)</sup>  | V <sub>meso</sub> <sup>c)</sup> | Ni        | Mo   | Al   |
| γ-Al <sub>2</sub> O <sub>3</sub>       | As calcined | 248.3                            | 14.9                             | 233.4                           | 0.004                             | 0.766                           |           |      | -    |
| CoMoS/γ-Al <sub>2</sub> O <sub>3</sub> | Sulfided    | 198                              | 13.7                             | 184.3                           | 0.005                             | 0.495                           | 6.1       | 16   | 78.0 |
| NiMoS/γ-Al <sub>2</sub> O <sub>3</sub> | Sulfided    | 187.4                            | 12.9                             | 174.5                           | 0.004                             | 0.531                           | 6.6       | 16.7 | 76.7 |

<sup>a)</sup> Calculated by *t*-plot method.<sup>b)</sup> S<sub>total</sub> - S<sub>micro</sub><sup>c)</sup> V<sub>total</sub> - V<sub>micro</sub>

**Table S5.** Group of S compounds in LCO and hydrotreated LCO at 613K

|                                                           | <sup>a</sup> Total HDS<br>Conversion<br>/ % | <sup>b</sup> Sulfur Group 1<br>HDS conversion / %                                 |                  | <sup>c</sup> Sulfur Group 2<br>HDS conversion / %                                  |                  | <sup>d</sup> Sulfur Group 3<br>HDS conversion / %                                   |                  | <sup>e</sup> Sulfur Group 4<br>HDS conversion / %                                   |                  |
|-----------------------------------------------------------|---------------------------------------------|-----------------------------------------------------------------------------------|------------------|------------------------------------------------------------------------------------|------------------|-------------------------------------------------------------------------------------|------------------|-------------------------------------------------------------------------------------|------------------|
|                                                           |                                             |  | Total<br>Group 1 |  | Total<br>Group 2 |  | Total<br>Group 3 |  | Total<br>Group 4 |
| CoMoS <sub>2</sub> : 0.0 h                                | 14.58                                       | 91.36                                                                             | 49.38            | 8.11                                                                               | 8.38             | 0.64                                                                                | 3.28             | 0.02                                                                                | 0.64             |
| CoMoS <sub>2</sub> : 0.5 h                                | 34.91                                       | 96.17                                                                             | 89.51            | 27.82                                                                              | 29.59            | 6.23                                                                                | 12.07            | 2.54                                                                                | 6.66             |
| CoMoS <sub>2</sub> : 1.0 h                                | 42.67                                       | 99.99                                                                             | 95.36            | 47.58                                                                              | 42.10            | 8.30                                                                                | 15.61            | 2.70                                                                                | 7.87             |
| CoMoS <sub>2</sub> : 1.5 h                                | 49.52                                       | 99.99                                                                             | 97.32            | 65.09                                                                              | 52.70            | 12.01                                                                               | 21.27            | 2.98                                                                                | 10.37            |
| CoMoS <sub>2</sub> : 2.0 h                                | 55.71                                       | 99.99                                                                             | 98.69            | 80.75                                                                              | 62.00            | 17.76                                                                               | 27.14            | 4.20                                                                                | 12.57            |
| CoMoS <sub>2</sub> : k / 10 <sup>-1</sup> h <sup>-1</sup> | 3.6                                         | N/D                                                                               | N/D              | 4.8                                                                                | 3.2              | 0.60                                                                                | 1.0              | 0.12                                                                                | 0.40             |
| NiMoS <sub>2</sub> : 0.0 h                                | 20.64                                       | 87.70                                                                             | 64.98            | 11.99                                                                              | 14.76            | 1.05                                                                                | 4.81             | 1.70                                                                                | 1.98             |
| NiMoS <sub>2</sub> : 0.5 h                                | 41.06                                       | 93.16                                                                             | 92.69            | 40.48                                                                              | 41.01            | 9.28                                                                                | 15.59            | 1.99                                                                                | 6.45             |
| NiMoS <sub>2</sub> : 1.0 h                                | 53.14                                       | 93.75                                                                             | 95.47            | 73.24                                                                              | 60.11            | 18.82                                                                               | 25.59            | 3.25                                                                                | 9.30             |
| NiMoS <sub>2</sub> : 1.5 h                                | 61.40                                       | 96.96                                                                             | 96.53            | 87.88                                                                              | 69.17            | 34.00                                                                               | 38.34            | 3.83                                                                                | 14.33            |
| NiMoS <sub>2</sub> : 2.0 h                                | 67.69                                       | 97.98                                                                             | 96.80            | 97.96                                                                              | 73.59            | 50.27                                                                               | 51.22            | 9.29                                                                                | 21.87            |
| NiMoS <sub>2</sub> : k / 10 <sup>-1</sup> h <sup>-1</sup> | 4.3                                         | N/D                                                                               | N/D              | 5.9                                                                                | 5.4              | 1.4                                                                                 | 2.2              | 0.21                                                                                | 0.80             |

$$^a \text{Total HDS conversion (\%)} = \left[ 1 - \frac{\text{Sulfur in product (wt\%)}}{\text{Sulfur in feed (wt\%)}} \right] \times 100$$

$$^b \text{Sulfur Group 1 HDS conversion (\%)} = \left[ 1 - \frac{\text{SG 1 in product (wt\%)}}{\text{SG 1 in feed (wt\%)}} \right] \times 100$$

$$^c \text{Sulfur Group 2 HDS conversion (\%)} = \left[ 1 - \frac{\text{SG 2 in product (wt\%)}}{\text{SG 2 in feed (wt\%)}} \right] \times 100$$

$$^d \text{Sulfur Group 3 HDS conversion (\%)} = \left[ 1 - \frac{\text{SG 3 in product (wt\%)}}{\text{SG 3 in feed (wt\%)}} \right] \times 100$$

$$^e \text{Sulfur Group 4 HDS conversion (\%)} = \left[ 1 - \frac{\text{SG 4 in product (wt\%)}}{\text{SG 4 in feed (wt\%)}} \right] \times 100$$

**Table S6.** Group of N compounds in LCO and hydrotreated LCO at 613K

|                                                            | <sup>a</sup> Total HDN Conversion / % | <sup>b</sup> Nitrogen Group 2 HDN conversion / %                                  |               | <sup>c</sup> Nitrogen Group 3 HDN conversion / %                                    |               | <sup>d</sup> Nitrogen Group 4 HDN conversion / %                                    |               |
|------------------------------------------------------------|---------------------------------------|-----------------------------------------------------------------------------------|---------------|-------------------------------------------------------------------------------------|---------------|-------------------------------------------------------------------------------------|---------------|
|                                                            |                                       | 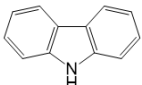 | Total Group 2 |  | Total Group 3 |  | Total Group 4 |
| CoMoS <sub>2</sub> : 0.0 h                                 | 0.82                                  | 0.51                                                                              | 0.99          | 0.27                                                                                | 0.55          | 0.37                                                                                | 0.52          |
| CoMoS <sub>2</sub> : 0.5 h                                 | 2.02                                  | 0.94                                                                              | 2.64          | 0.58                                                                                | 1.07          | 0.44                                                                                | 0.89          |
| CoMoS <sub>2</sub> : 1.0 h                                 | 3.22                                  | 1.86                                                                              | 4.42          | 0.94                                                                                | 1.39          | 0.57                                                                                | 1.03          |
| CoMoS <sub>2</sub> : 1.5 h                                 | 4.89                                  | 4.57                                                                              | 6.70          | 2.91                                                                                | 2.20          | 0.84                                                                                | 1.21          |
| CoMoS <sub>2</sub> : 2.0 h                                 | 5.97                                  | 5.53                                                                              | 8.24          | 3.29                                                                                | 2.59          | 1.02                                                                                | 1.44          |
| CoMoS <sub>2</sub> : k (10 <sup>-2</sup> h <sup>-1</sup> ) | 1.80                                  | 2.40                                                                              | 3.00          | 1.20                                                                                | 0.60          | 0.24                                                                                | 0.30          |
| NiMoS <sub>2</sub> : 0.0 h                                 | 1.44                                  | 8.31                                                                              | 4.92          | 3.53                                                                                | 4.43          | 0.01                                                                                | 0.90          |
| NiMoS <sub>2</sub> : 0.5 h                                 | 8.31                                  | 21.12                                                                             | 16.00         | 14.97                                                                               | 14.14         | 0.13                                                                                | 6.64          |
| NiMoS <sub>2</sub> : 1.0 h                                 | 13.22                                 | 30.19                                                                             | 25.20         | 19.49                                                                               | 20.25         | 0.55                                                                                | 9.48          |
| NiMoS <sub>2</sub> : 1.5 h                                 | 20.73                                 | 41.51                                                                             | 29.92         | 24.29                                                                               | 23.71         | 1.01                                                                                | 11.10         |
| NiMoS <sub>2</sub> : 2.0 h                                 | 24.27                                 | 46.20                                                                             | 34.50         | 27.18                                                                               | 27.12         | 2.13                                                                                | 13.16         |
| NiMoS <sub>2</sub> : k (10 <sup>-2</sup> h <sup>-1</sup> ) | 10.20                                 | 20.40                                                                             | 13.80         | 10.20                                                                               | 10.20         | 0.60                                                                                | 4.80          |

$$^a \text{ Total HDN conversion (\%)} = \left[ 1 - \frac{\text{Nitrogen in product (wt\%)}}{\text{Nitrogen in feed (wt\%)}} \right] \times 100$$

$$^b \text{ Nitrogen Group 2 HDN conversion (\%)} = \left[ 1 - \frac{\text{NG2 in product (wt\%)}}{\text{NG2 in feed (wt\%)}} \right] \times 100$$

$$^c \text{ Nitrogen Group 3 HDN conversion (\%)} = \left[ 1 - \frac{\text{NG3 in product (wt\%)}}{\text{NG3 in feed (wt\%)}} \right] \times 100$$

$$^d \text{ Nitrogen Group 4 HDN conversion (\%)} = \left[ 1 - \frac{\text{NG4 in product (wt\%)}}{\text{NG4 in feed (wt\%)}} \right] \times 100$$



**Table S7.** Rate constants during HDN of CBZ and HDS of DBT over the NiMoS

| Reaction                                                 | Rate constants ( $k_{1N}$ ) of<br>100ppmN CBZ / $h^{-1}$ | Rate constants ( $k_{2N}$ ) of<br>500ppmS DBT / $h^{-1}$ | Rate constants ( $k_{3N}$ ) of<br>100ppmN CBZ<br>& 500ppmS DBT / $h^{-1}$ | Rate of<br>change / % |
|----------------------------------------------------------|----------------------------------------------------------|----------------------------------------------------------|---------------------------------------------------------------------------|-----------------------|
| CBZ $\rightarrow$ THC ( $k_{11}$ )                       | 3.30                                                     | -                                                        | 2.46                                                                      | -25.45                |
| THC $\rightarrow$ BCH ( $k_{12}$ )                       | 4.08                                                     | -                                                        | 1.08                                                                      | -73.53                |
| THC $\rightarrow$ CHA ( $k_{13}$ )                       | 0.84                                                     | -                                                        | 0.36                                                                      | -57.14                |
| CHA $\rightarrow$ CHB ( $k_{14}$ )                       | 9.66                                                     | -                                                        | 3.00                                                                      | -68.94                |
| CHB $\rightarrow$ BCH ( $k_{15}$ , $k_{23}$ , $k_{33}$ ) | 2.82                                                     | 0.9                                                      | 2.76                                                                      | -                     |
| DBT $\rightarrow$ BP ( $k_{21}$ )                        | -                                                        | 12.9                                                     | 11.10                                                                     | -13.95                |
| BP $\rightarrow$ CHB ( $k_{22}$ )                        | -                                                        | 3.42                                                     | 1.02                                                                      | -70.18                |
